# Supplementary material for: A Putative Amidase Endolysin Encoded by Clostridium perfringens St13 Exhibits Specific Lytic Activity and Synergizes with the Muramidase Endolysin Psm
Source: PubMed Central journal article supplement (PMC7999503; doi:10.3390/antibiotics10030245), 2021-03-01
Supplement: antibiotics-10-00245-s001.pdf [file antibiotics-10-00245-s001.pdf]

**Supplementary Materials:**

**A putative amidase endolysin encoded by *Clostridium perfringens* st13 exhibits specific lytic activity and synergizes with the muramidase endolysin Psm**

Hiroshi Sekiya, Maho Okada, Eiji Tamai, Toshi Shimamoto, Tadashi Shimamoto, Hirofumi Nariya

**Figure S1** Alignment of the catalytic domain T7 (PF01510: Amidase\_2) family amidase.

**Figure S2** Genes flanking *psa* (CPE1138) in the *C. perfringens* st13 genome.

**Figure S3** Lytic activities of Psa-his, PsaCD-his, PsaBD-his, and PsaY51F-his.

**Figure S4** Zymography analysis of Psa-his, PsaCD-his, PsaBD-his, and PsaY51F-his.

**Figure S5** Inhibition of Psa-his by Zn<sup>2+</sup>.

**Figure S6** Binding of Psa-his to *C. perfringens* SM101 cells and spores.

**Table S1** Strains and culture conditions used in this study

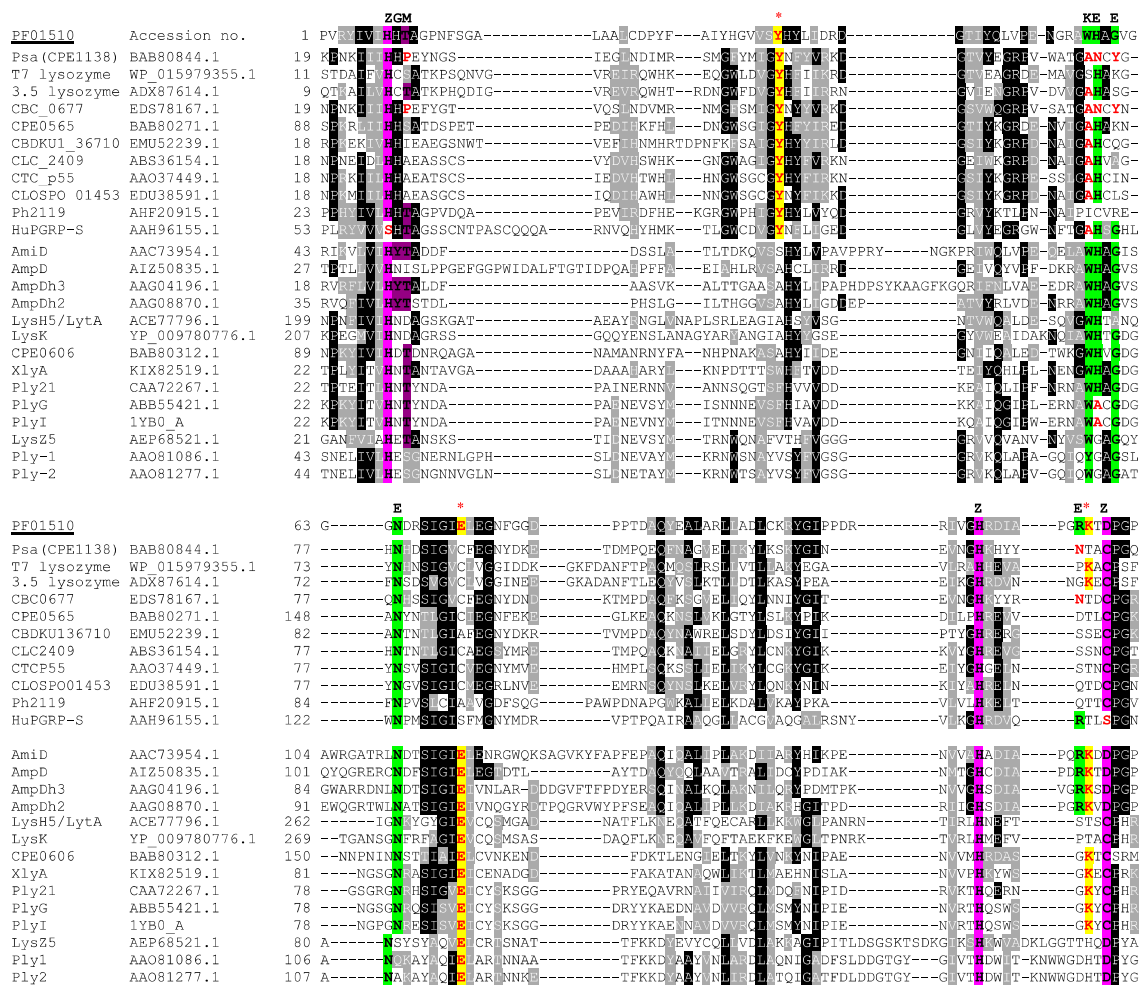

**Figure S1.** Alignment of the catalytic domain T7 (PF01510: Amidase\_2) family amidase. Sequence alignment was created using Clustal Omega (<https://www.ebi.ac.uk/Tools/msa/clustalo/>). Accession no.: NCBI GenBank accession number. Conserved and identical residues (more than half) are shaded in gray and black, respectively. \*: catalytic residue, Z : zinc-binding residue, G: GlcNAc-binding residue, M: MurNAc-binding residue, E:  $\gamma$ -D-Glu (Gln)-binding residue, and K: L-Lys-binding residue.

#### Amidase catalytic site

Cheng X, Zhang X, Pflugrath JW, Studier FW. (1994) The structure of bacteriophage T7 lysozyme, a zinc amidase and an inhibitor of T7 RNA polymerase. *Proc Natl Acad Sci U S A.* 91(9):4034-4038.

#### Zn binding residues

Low LY, Yang C, Perego M, Osterman A, Liddington RC. (2005) Structure and lytic activity of a *Bacillus anthracis* prophage endolysin. *J Biol Chem.* 280(42):35433-35439.

#### Substrate binding site

Guan R, Roychowdhury A, Ember B, Kumar S, Boons GJ, Mariuzza RA. (2004) Structural basis for peptidoglycan binding by peptidoglycan recognition proteins. *Proc Natl Acad Sci U S A.* 101(49):17168-17173

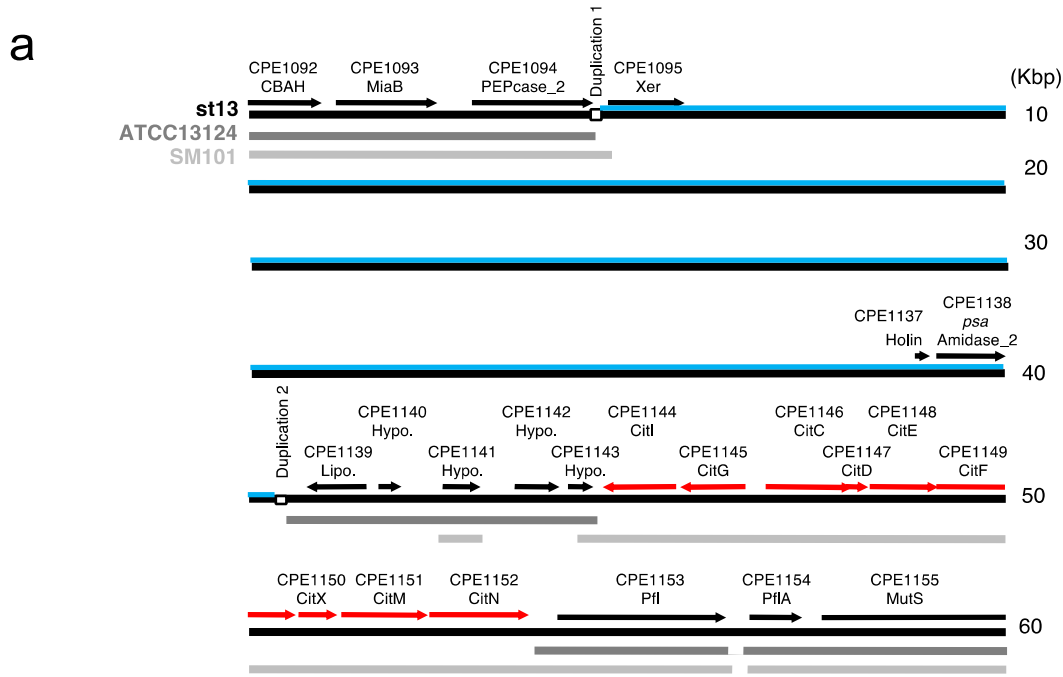

**b**

| Gene Tag | aa   | Description                                    | Gene Tag | aa  | Description                                     |
|----------|------|------------------------------------------------|----------|-----|-------------------------------------------------|
| CPE1095  | 338  | Phage integrase/Site-specific recombinase, Xer | CPE1117  | 194 | Phage terminase, small subunit, TerS            |
| CPE1096  | 99   | Hypo.                                          | CPE1118  | 558 | Phage terminase, large subunit, TerL            |
| CPE1097  | 70   | HTH_XRE                                        | CPE1119  | 57  | Hypo.                                           |
| CPE1098  | 154  | Hypo.                                          | CPE1120  | 407 | Phage_portal HK97 family                        |
| CPE1099  | 100  | Hypo.                                          | CPE1121  | 200 | Phage prohead protease HK97 family              |
| CPE1100  | 230  | HTH_XRE                                        | CPE1122  | 378 | Phage major capsid protein, HK97 family         |
| CPE1101  | 77   | Hypo.                                          | CPE1123  | 97  | Head-Tail Connector Protein, HK97 family        |
| CPE1102  | 276  | Hypo.                                          | CPE1124  | 105 | Phage head-tail joining protein                 |
| CPE1103  | 1064 | Cons., Phage-related                           | CPE1125  | 147 | Phage protein, HK97 family                      |
| CPE1104  | 143  | Cons.                                          | CPE1126  | 116 | Phage protein                                   |
| CPE1105  | 106  | Hypo.                                          | CPE1127  | 199 | Phage major tail protein, phi13 family          |
| CPE1106  | 56   | Hypo.                                          | CPE1128  | 101 | Phage protein                                   |
| CPE1107  | 306  | Cons.                                          | CPE1129  | 111 | Cons.                                           |
| CPE1108  | 60   | Hypo.                                          | CPE1130  | 933 | Phage tail tape measure protein                 |
| CPE1109  | 151  | Hypo.                                          | CPE1131  | 231 | Phage tail protein                              |
| CPE1110  | 365  | Bro-N, Prophage antirepressor                  | CPE1132  | 983 | Phage endopeptidase/lysozyme tail               |
| CPE1111  | 52   | Hypo.                                          | CPE1133  | 624 | Phage minor structural protein, choline-binding |
| CPE1112  | 88   | Toxin YafO, type II toxin-antitoxin system     | CPE1134  | 648 | Phage protein                                   |
| CPE1113  | 127  | Hypo.                                          | CPE1135  | 80  | Hypo.                                           |
| CPE1114  | 59   | Hypo.                                          | CPE1136  | 59  | Hemolysin XhIA family                           |
| CPE1115  | 80   | Hypo.                                          | CPE1137  | 67  | Cons. Phage exported protein, Holin             |
| CPE1116  | 136  | HNH endonuclease                               | CPE1138  | 304 | Amidase_2, Endolysin                            |

**Figure S2.** Genes flanking *psa* (CPE1138) in the *C. perfringens* st13 genome. (a) Straight lines represent the genomes of *C. perfringens* st13 (black), ATCC13124 (dark gray), and SM101 (light gray). The arrows indicate the genes (open reading frames), and the Gene Tags and names of the putative functions or protein products are indicated above the arrows. The region between duplication 1 and 2 (white square) of the *C. perfringens* st13 genome is considered a phage remnant region (light blue), given the existence of many phage-related genes. The other *C. perfringens* strains lack the phage remnant region upstream of *psa*. Genes related to citrate fermentation are indicated by red arrows. (b) The genes in the genome from region CPE1095 to CPE1138 in *C. perfringens* st13 are listed. Cons.: conserved protein, Hypo.: hypothetical protein. Lipo.: lipoprotein.

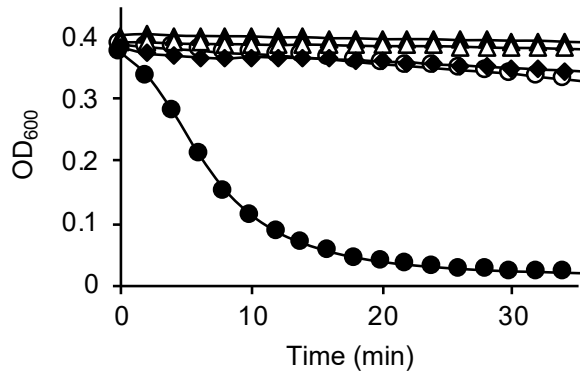

**Figure S3.** Lytic activities of Psa-his, PsaCD-his, PsaBD-his, and PsaY51F-his. The lytic activities of the purified enzymes were determined by the turbidity reduction assay using *C. perfringens* HN1314 cells suspended in PBS(-). Purified Psa-his (black circles), PsaCD-his (white circles), PsaBD-his (black triangles), and PsaY51F-his (white triangles) were added to pre-incubated cells to a final concentration of 10  $\mu\text{g/ml}$ , and then OD<sub>600</sub> was measured at 2-min intervals for 35min. A parallel no-enzyme control experiment was performed in the same manner using buffer control (black diamonds).

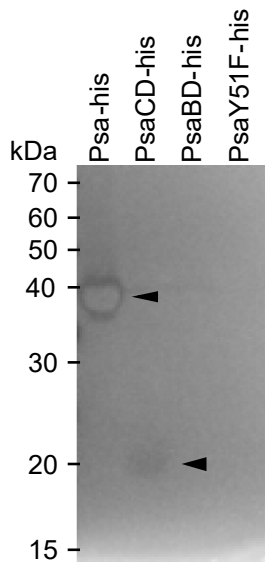

**Figure S4.** Zymography analysis of Psa-his, PsaCD-his, PsaBD-his, and PsaY51F-his. Purified Psa-his, PsaCD-his, PsaBD-his, and PsaY51F-his (each 2  $\mu\text{g}$ ) were electrophoresed in a 12.5% SDS-polyacrylamide gel containing 20 OD<sub>600</sub> of heat-inactivated and SDS-treated *C. perfringens* HN1314 cells. Zymography analysis was carried out as described previously [31]. The arrowheads indicate cell lysis.

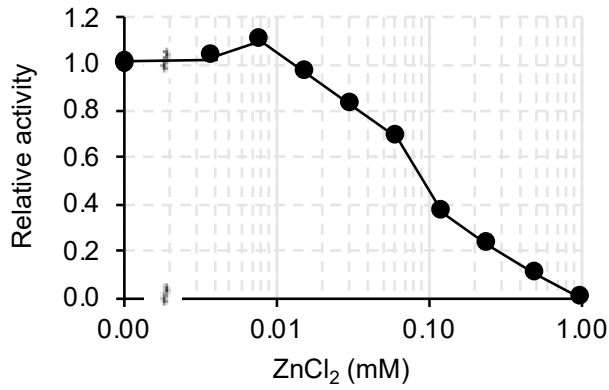

**Figure S5.** Inhibition of Psa-his by Zn<sup>2+</sup>. Psa-his was tested at various concentrations of ZnCl<sub>2</sub> against *C. perfringens* HN1314 in 25 mM Tris-HCl pH 7.0, 250 mM NaCl, and 1 mM dithiothreitol.

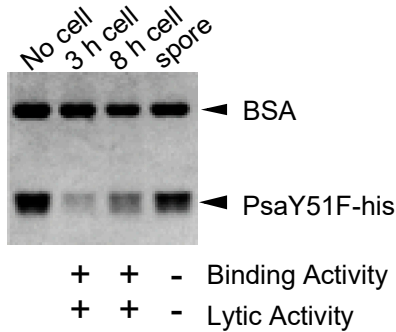

**Figure S6.** Binding of Psa-his to *C. perfringens* SM101 cells and its spores. The binding activity was measured according to the Materials and Methods. Purified PsaY51F-his and BSA were mixed with mid-logarithmic growth phase *C. perfringens* cells (3 h cell) or mid-stationary growth phase *C. perfringens* cells (8 h cell) or its spores (spore) or buffer (No cell), centrifuged, and the supernatants were analyzed by 12.5% SDS-PAGE. The spores of *C. perfringens* SM101 were prepared by culturing in mDS for 48 h, sonicating, washing three times with PBS(-), and counting in a Thoma cell counter.

**Table S1 Strains and culture conditions used in this study.**

| Organism                            | Strain       | Culture conditions                  |
|-------------------------------------|--------------|-------------------------------------|
| Gram(+)                             |              |                                     |
| <i>Clostridium perfringens</i>      | HN1314       | AN, Static, 37°C, 8 h, TY-G1        |
| <i>Clostridium perfringens</i>      | st13         | AN, Static, 37°C, 8 h, TY-G1        |
| <i>Clostridium perfringens</i>      | ATCC13124    | AN, Static, 37°C, 8 h, TY-G1        |
| <i>Clostridium perfringens</i>      | SM101        | AN, Static, 37°C, 4h and 8 h, TY-G1 |
| <i>Clostridium perfringens</i>      | SM101(spore) | AN, Static, 37°C, 48 h, mDS         |
| <i>Clostridium acetobutylicum</i>   | ATCC824      | AN, Static, 37°C, 24 h, TY-G1       |
| <i>Clostridium cellulolyticum</i>   | ATCC35319    | AN, Static, 37°C, 24 h, TY/2-CB0.5  |
| <i>Clostridium coccooides</i>       | ATCC29236    | AN, Static, 37°C, 10 h, TY-G1       |
| <i>Clostridium histolyticum</i>     | ATCC19401    | AN, Static, 37°C, 12 h, TY-G1       |
| <i>Clostridium lituseburense</i>    | ATCC25759    | AN, Static, 37°C, 8 h, TY-G1        |
| <i>Clostridium novyi</i>            | ATCC17861    | AN, Static, 37°C, 14 h, TY-G1       |
| <i>Clostridium sporosum</i>         | ATCC25582    | AN, Static, 37°C, 12 h, TY-G1       |
| <i>Clostridium sporogenes</i>       | ATCC3584     | AN, Static, 37°C, 8 h, TY-G1        |
| <i>Clostridium tetani</i>           | KZ1113       | AN, Static, 37°C, 8 h, TY-G1        |
| <i>Clostridioides difficile</i>     | ATCC9689     | AN, Static, 37°C, 8 h, TY-G1        |
| <i>Atopobium fossor</i>             | ATCC43386    | AN, Static, 37°C, 24 h, GAM         |
| <i>Bacillus subtilis</i>            | 168          | AE, Shaking, 37°C, 8 h, LB          |
| <i>Bifidobacterium adolescentis</i> | ATCC15703    | AN, Static, 37°C, 10 h, TY-G1       |
| <i>Enterococcus faecalis</i>        | IID682       | AE, Shaking, 37°C, 6 h, BHI         |
| <i>Eubacterium cylindroides</i>     | ATCC27805    | AN, Static, 37°C, 8 h, TY-G1        |
| <i>Lactobacillus reuteri</i>        | ATCC23272    | AN, Static, 37°C, 8 h, MRS          |
| <i>Listeria monocytogenes</i>       | HCIPH A5-1   | AE, Shaking, 37°C, 8 h, BHI         |
| <i>Micrococcus luteus</i>           | ATCC4698     | AE, Shaking, 37°C, 14 h, LB         |
| <i>Staphylococcus aureus</i>        | ATCC6538P    | AE, Shaking, 37°C, 8 h, LB          |
| <i>Staphylococcus epidermidis</i>   | ATCC35984    | AE, Shaking, 37°C, 8 h, BHI         |
| <i>Streptococcus pneumoniae</i>     | IID555       | AE, Static, 37°C, 8 h, BHI          |
| <i>Streptococcus pyogenes</i>       | 124/0207     | AE, Static, 37°C, 8 h, BHI          |
| Gram(-)                             |              |                                     |
| <i>Bacteroides fragilis</i>         | ATCC25285    | AN, Static, 37°C, 16 h, TY-G1       |
| <i>Escherichia coli</i>             | K-12         | AE, Shaking, 37°C, 8 h, LB          |
| <i>Pseudomonas aeruginosa</i>       | PAO1         | AE, Shaking, 37°C, 8 h, LB          |
| <i>Vibrio cholerae</i>              | O1/P1418     | AE, Shaking, 37°C, 8 h, LB          |
| <i>Vibrio cholerae</i>              | O139/MDO-6   | AE, Shaking, 37°C, 8 h, LB          |
| <i>Vibrio parahaemolyticus</i>      | RIMD2210115  | AE, Shaking, 37°C, 8 h, LB          |

AN and AE are aerobic and anaerobic conditions, respectively.

AN : Static culture under anaerobic conditions in tightly capped tubes

AE : Culture in test tube, shaking at 160/min

Media:

BHI: Brain Heart Infusion broth (BHI ; Eiken Chemical Co., Ltd., Tokyo, Japan)

GAM: Gifu Anaerobic Medium broth (Nissui Seiyaku Co., Ltd., Tokyo, Japan)

LB: Luria–Bertani broth (Wako Pure Chemical Industries Ltd., Osaka, Japan)

mDS (modified Duncan-Strong medium): 1.5% BACT-Peptone, 1% Na<sub>2</sub>HPO<sub>4</sub> 7H<sub>2</sub>O, 0.4% BACT-Yeast Extract, 0.4% raffinose, 0.1% sodium thioglycolate, pH 7.8

MRS: de Man Rogosa and Sharpe broth (Sigma Aldrich, St. Louis, MO, USA)

TY-G1: 3% Tryptone, 2% Yeast Extract, 0.1% sodium thioglycolate, and 1% glucose (30)

TY/2-CB0.5: 1.5% Tryptone, 1% Yeast Extract, 0.05% sodium thioglycolate, and 0.5% cellobiose
